# Supplementary material for: Synergistic Effect of Dietary Supplementation with Sodium Butyrate, β-Glucan and Vitamins on Growth Performance, Cortisol Level, Intestinal Microbiome and Expression of Immune-Related Genes in Juvenile African Catfish (Clarias gariepinus)
Source: MDPI journal article supplement (doi:10.3390/ijms25094619), 2024-04-24
Supplement: s1 [file s1]

**Table S1:** Relative abundance (%) of bacteria at Phylum and Genus level in the gut microbiome of juvenile African catfish (*Clarias gariepinus*) fed commercial feed in the control group (C) and fed with enriched feed (W1 – W3) in research groups during a feeding experiment.

| Phylum                                           | Groups |        |        |        |
|--------------------------------------------------|--------|--------|--------|--------|
|                                                  | C (%)  | W1 (%) | W2 (%) | W3 (%) |
| <i>Actinobacteriota</i>                          | 12.56  | 10.81  | 5.89   | 9.75   |
| <i>Bacteroidota</i>                              | 14.73  | 6.85   | 5.74   | 9.10   |
| <i>Cyanobacteria</i>                             | 0.19   | 0.13   | 0.13   | 0.15   |
| <i>Firmicutes</i>                                | 5.85   | 6.15   | 5.01   | 5.67   |
| <i>Fusobacteriota</i>                            | 51.26  | 61.44  | 51.35  | 54.68  |
| <i>Proteobacteria</i>                            | 15.13  | 14.22  | 31.76  | 20.37  |
| <i>Verrucomicrobiota</i>                         | 0.17   | 0.26   | 0.09   | 0.17   |
| Others                                           | 0.10   | 0.15   | 0.03   | 0.10   |
| Genus                                            | C (%)  | W1 (%) | W2 (%) | W3 (%) |
| <i>Microbacteriaceae</i>                         | 8.14   | 6.46   | 3.50   | 5.25   |
| <i>Aurantimicrobium</i>                          | 2.97   | 3.28   | 1.80   | 2.41   |
| <i>Klugiella</i>                                 | 0.81   | 0.73   | 0.33   | 0.20   |
| <i>Bacteroides</i>                               | 1.85   | 1.71   | 0.40   | 0.28   |
| <i>Barnesiellaceae; G: uncultured</i>            | 7.78   | 3.57   | 2.77   | 3.86   |
| <i>Macellibacteroides</i>                        | 4.76   | 1.44   | 2.46   | 2.58   |
| <i>Anaerorhabdus furcosa</i> group               | 1.42   | 1.80   | 1.70   | 1.22   |
| <i>Christensenellaceae R-7</i> group             | 0.49   | 1.09   | 0.06   | 0.23   |
| <i>Peptostreptococcaceae</i>                     | 1.99   | 2.01   | 2.00   | 1.27   |
| <i>Romboutsia</i>                                | 0.99   | 0.47   | 0.69   | 0.49   |
| <i>Cetobacterium</i>                             | 51.27  | 61.44  | 51.35  | 65.21  |
| <i>Rhizobiales Incertae Sedis; G: uncultured</i> | 0.72   | 0.65   | 0.34   | 0.35   |
| <i>GKS98 freshwater</i> group                    | 3.54   | 2.38   | 1.48   | 1.43   |
| <i>Polynucleobacter</i>                          | 0.90   | 1.41   | 0.51   | 2.71   |
| <i>Rhodocyclaceae;g: C39</i>                     | 8.32   | 9.33   | 29.04  | 10.02  |
| <i>Plesiomonas</i>                               | 1.11   | 0.09   | 0.17   | 0.10   |
| Others                                           | 2.96   | 2.13   | 1.40   | 2.40   |
